# Supplementary figures and images for: Co-Occurrence of Interleukin-6 Receptor Asp358Ala Variant and High Plasma Levels of IL-6: An Evidence of IL-6 Trans-Signaling Activation in Deep Vein Thrombosis (DVT) Patients
Source: MDPI journal article supplement (doi:10.3390/biom12050681), 2022-05-10

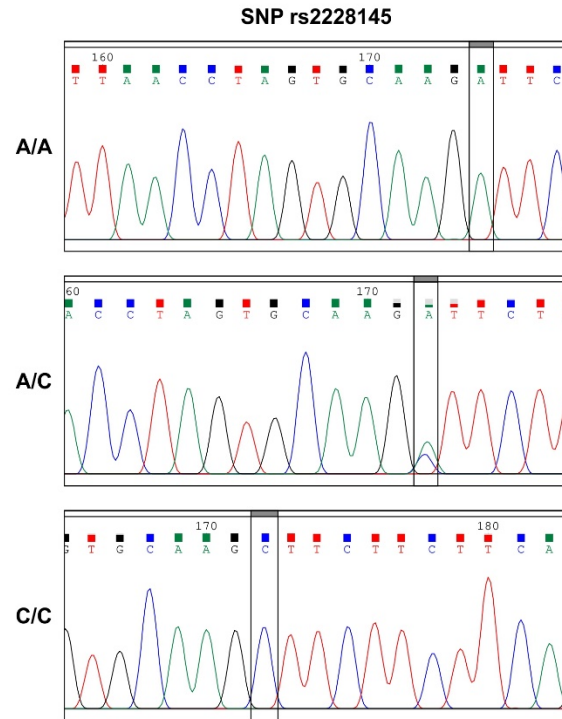

Figure S1. Representative sequencing chromatograms of the AA, AC, and CC genotypes of IL6R rs2228145 SNP.

Supplement: s1 [file s1]
